# Supplementary material for: All-inorganic perovskite quantum dot/mesoporous TiO2 composite-based photodetectors with enhanced performance
Source: Royal Society of Chemistry journal article supplement (doi:10.1039/c6dt04758k), 2016-12-22
Supplement: c6dt04758k1.pdf [file c6dt04758k1.pdf]

## **Electronic Supplementary Information**

### **All-inorganic perovskite quantum dot/mesoporous TiO<sub>2</sub> composite-based photodetectors with enhanced performance**

Lin Zhou<sup>a</sup>, Kai Yu<sup>a</sup>, Fan Yang<sup>a</sup>, Jun Zheng<sup>a</sup>, Yuhua Zuo<sup>\*a</sup>, Chuanbo Li<sup>a</sup>, Buwen Cheng<sup>a</sup> and Qiming Wang<sup>a</sup>

<sup>a</sup>State Key Laboratory on Integrated Optoelectronics, Institute of Semiconductors, Chinese Academy of Sciences, Beijing 100083, China

## Experimental Section

**Materials Preparation:** All the reagents were purchased from Aladdin or Alfa Aesar and were used directly without further purification unless noted otherwise. As reported by Protesescu et al.,<sup>1</sup>  $\text{Cs}_2\text{CO}_3$  (0.814 g) was loaded into a 250 mL 3-necked flask along with octadecene (ODE, 40 mL) and oleic acid (OA, 2.5 mL), dried for 1 h at 140 °C, and then heated under  $\text{N}_2$  to 200 °C until all the  $\text{Cs}_2\text{CO}_3$  reacted with OA. Because Cs-oleate precipitates out of ODE at room temperature, it was preheated to 100 °C before injection. ODE (5 mL), oleylamine (OAm, 0.5 mL), dried OA (0.5 mL), and  $\text{PbBr}_2$  (0.069 g) were loaded into a 250 mL 3-necked flask and the temperature was increased to 120 °C under  $\text{N}_2$ . After complete solubilization of the  $\text{PbBr}_2$  salt, the temperature was increased to 180 °C and a Cs-oleate solution (0.4 mL, 0.125 M in ODE, prepared as described above and preheated before injection) was quickly injected, and 5 s later, the reaction mixture was cooled using an ice-water bath. After centrifugation at 8000 rpm for 10 min, the supernatant was discarded and the particles were re-dispersed in n-hexane forming stable solutions of colloidal  $\text{CsPbBr}_3$  QDs.

**Device Fabrication:** the glass substrates were cleaned successively using acetone, isopropanol, and de-ionized water. The planar interdigitated Ti/Au (50/200 nm) electrodes were fabricated using standard photolithography to pattern the photoresist for subsequent metallization and lift-off. We defined the channel length as 10  $\mu\text{m}$ , while the finger widths and the channel widths were 10  $\mu\text{m}$  and 2 mm, respectively. Then, the mesoporous  $\text{TiO}_2$  (mp- $\text{TiO}_2$ ) was deposited on top of the substrate by spin-coating  $\text{TiO}_2$  paste (Dyesol 18NR-T), which was diluted 4 times by absolute ethyl alcohol, at a rate of 2000 rpm for 30s. The layer was then sintered in air at 500 °C for 30 min. The thicknesses of the mp- $\text{TiO}_2$  films were controlled to ~200 nm. The above the  $\text{CsPbBr}_3$  QDs solution (~1 mg/mL) was deposited on the substrate (2000 rpm, 10 s) by spin-coating (3 times) and finally washing with pure 2-propanol (2000 rpm, 10s). This device was named MSM II. For device MSM I, the  $\text{CsPbBr}_3$  QD solution was drop-cast directly on a glass substrate with pre-patterned gold electrodes and annealed at 200 °C for 30 min in a  $\text{N}_2$  atmosphere.

**Characterization:** The UV-Vis spectra of the nanocrystal solution were collected using a Shimadzu UV3600PLUS UV-Vis-NIR spectrophotometer over an excitation range of 400–600 nm, at 0.5 nm intervals. Photoluminescence (PL) spectra and time-resolved PL decay spectra were measured using the Edinburgh Instruments (EI) FLS980 lifetime and steady state spectrometer. High-resolution transmission electron microscopy (HR-TEM) of the nanocrystals of the CsPbBr<sub>3</sub> perovskites was performed using a FEI Tecnai G2 F20 S-TWIN field emission transmission electron microscope. X-ray diffraction (XRD) measurements of the perovskite nanocrystals powder was performed using a BRUKER, AXS D8 ADVANCE X-ray powder diffractometer using monochromatized Cu-K $\alpha$  radiation ( $\lambda = 1.5406 \text{ \AA}$ ). Film morphologies of the mp-TiO<sub>2</sub> films were characterized by field emission scanning electron microscopy (FEI, Nova NanoSEM650). The current-voltage characteristics and time response of the perovskite devices were recorded using a semiconductor device analyzer (Agilent B1500A, USA). A 150 W halogen lamp (MLC-150C, Motic Asia, Hong Kong) was used as the light source for the photovoltaic (I-V) and time response measurements. Photoresponsivity (R) was calculated by measuring the photocurrent  $I_{ph}$  and dividing this value by the incident power  $P_{inc}$ , such that  $R = I_{ph}/P_{inc}$ . The spectral photocurrent was measured using a Stanford Research Systems SR830 lock-in amplifier. The monochromatic illumination was provided by a monochromator (Zolix, Omni- $\lambda$ 500) supplied with a tungsten-halogen light source (Zolix, LSH-T150). The light intensities ( $P_{inc}$ ) of the different wavelengths were measured by a photodiode power sensor (Thorlabs, S130VC). The light excitation was chopped at a frequency of 180 Hz. The device was biased using a Keithley 2611A system source meter. The detector was kept in a dark, shielded environment. And all characterizations were performed in air at room temperature.

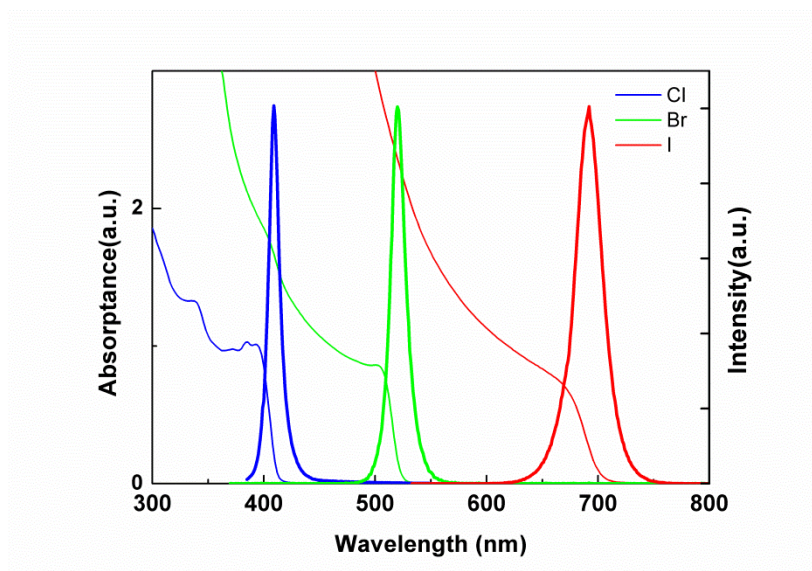

**Fig. S1** Absorption and photoluminescence (PL) spectra of CsPbX<sub>3</sub> (X = Cl, Br, or I) QDs in solution.

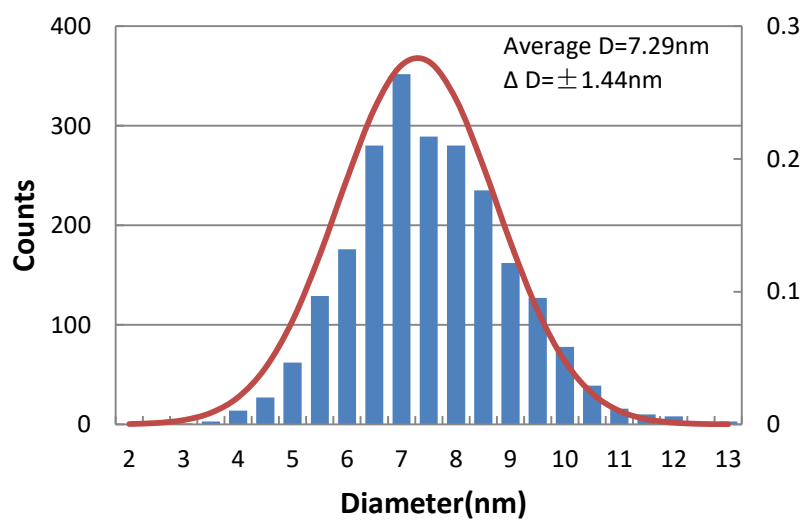

**Fig. S2** Analysis of size distribution for the sample shown in Fig. 1(c).

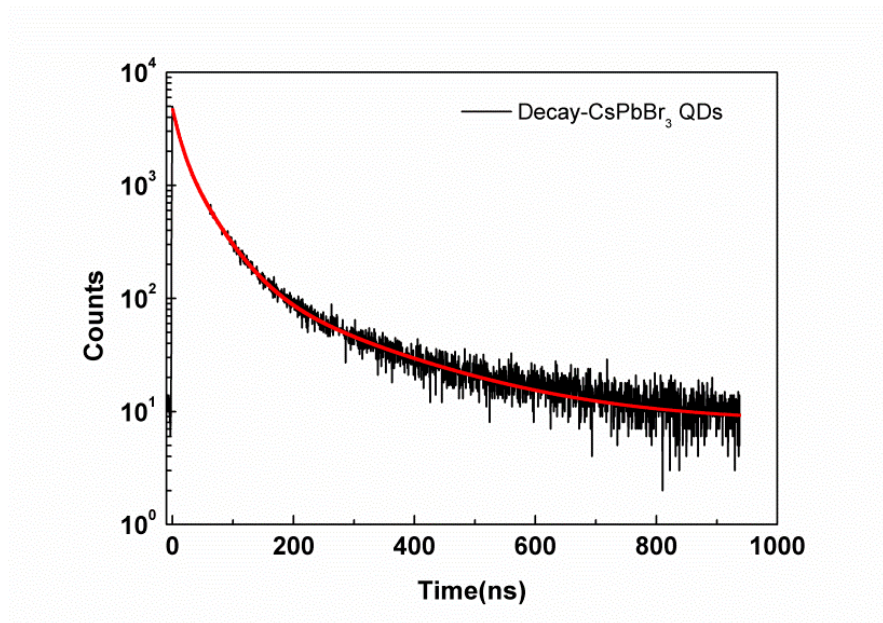

**Fig. S3** Time-resolved PL decay and radiative lifetime of CsPbBr<sub>3</sub> QDs in n-hexane solution.

| Sample                     | $\tau_1$ (ns) | Ratio1 | $\tau_2$ (ns) | Ratio2 | $\tau_3$ (ns) | Ratio3 | $\tau_{ave}^{\#}$ |
|----------------------------|---------------|--------|---------------|--------|---------------|--------|-------------------|
| pure QDs film              | 1.5           | 38.3%  | 7.5           | 39.3%  | 57.1          | 22.4%  | 16.31ns           |
| QDs on mp-TiO <sub>2</sub> | 1.0           | 37.2%  | 4.0           | 46.4%  | 16.5          | 16.4%  | 4.93ns            |
| QDs in n-hexane solution   | 12.3          | 21.3%  | 42.4          | 56.4%  | 189.0         | 22.3%  | 68.68ns           |

$$\tau_{ave}^{\#} = \text{Ratio1} * \tau_1 + \text{Ratio2} * \tau_2 + \text{Ratio3} * \tau_3$$

**Table S1.** Values for TRPL characteristics of pure QDs film after annealing, QDs on mp-TiO<sub>2</sub>, and QDs in n-hexane solution.

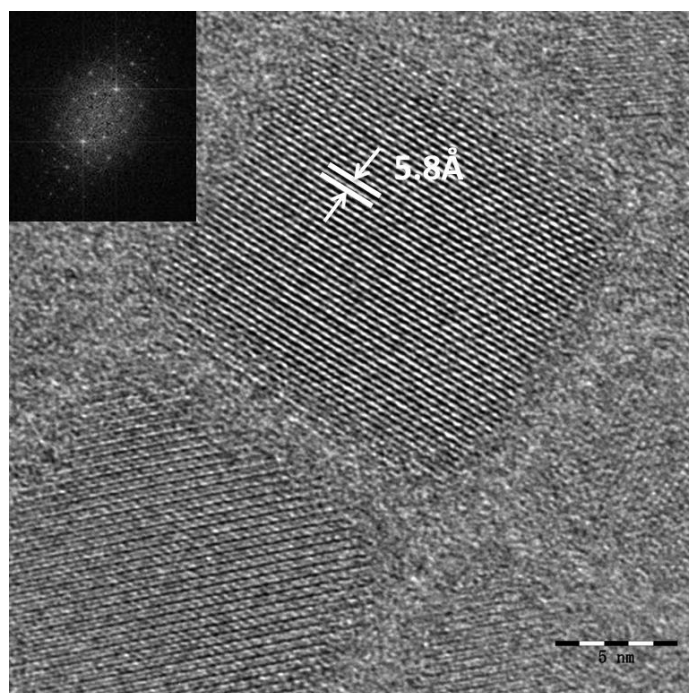

**Fig. S4** HRTEM images of a typical CsPbBr<sub>3</sub> QDs (scale bar 5 nm). The insets in the top left corner are the corresponding FFT images.

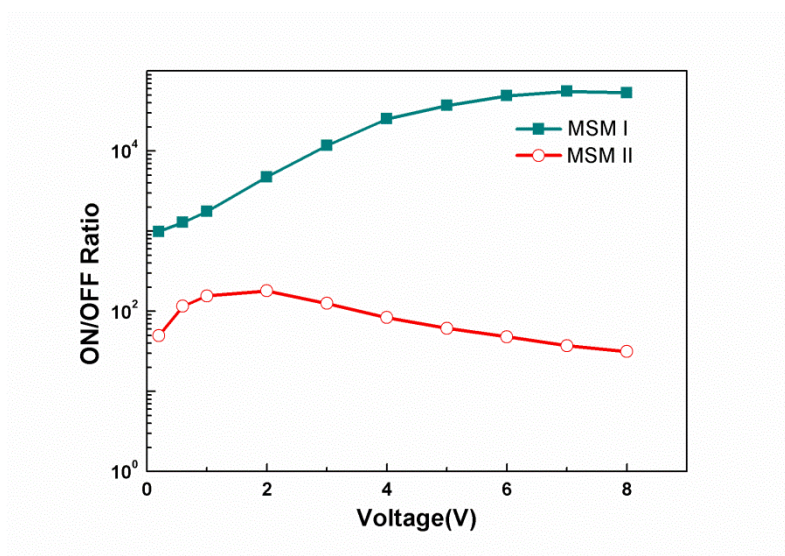

**Fig. S5** On/off ratios of the devices at different bias.

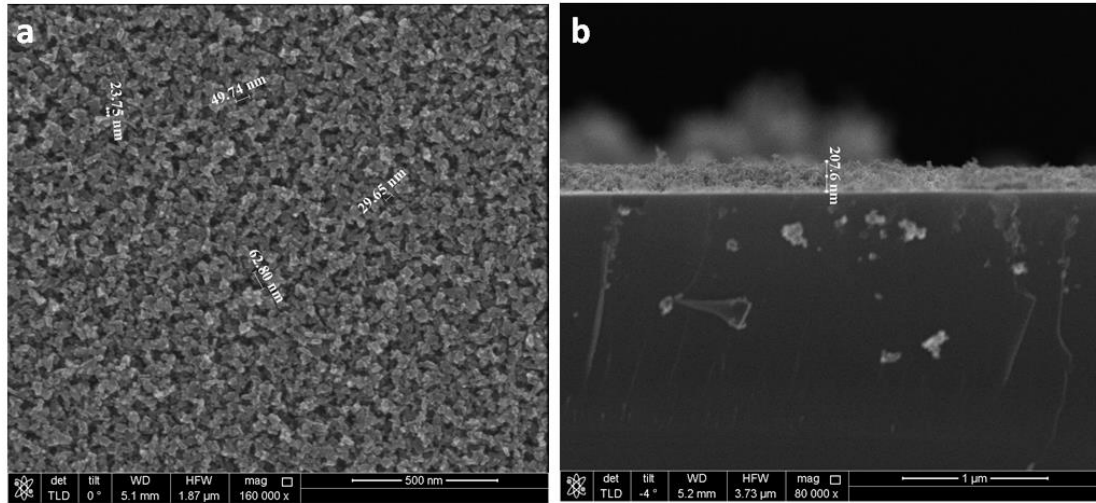

**Fig. S6** Morphology of the mp-TiO<sub>2</sub> film on Si substrate. a) Top view SEM images. b) SEM cross-sectional images of the mp-TiO<sub>2</sub> film.

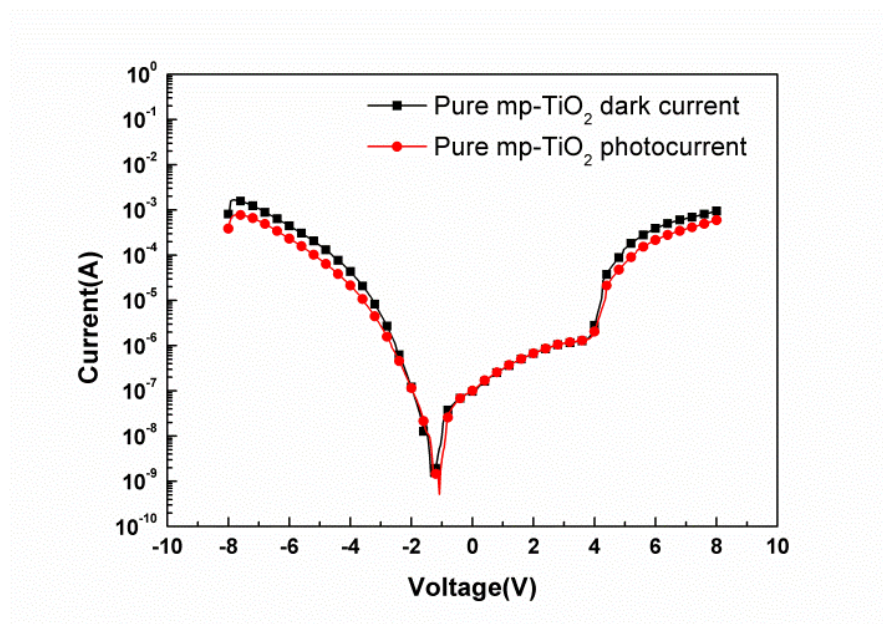

**Fig. S7** Dark and photocurrent I-V curves of our fabricated mp-TiO<sub>2</sub>-based photodetectors.



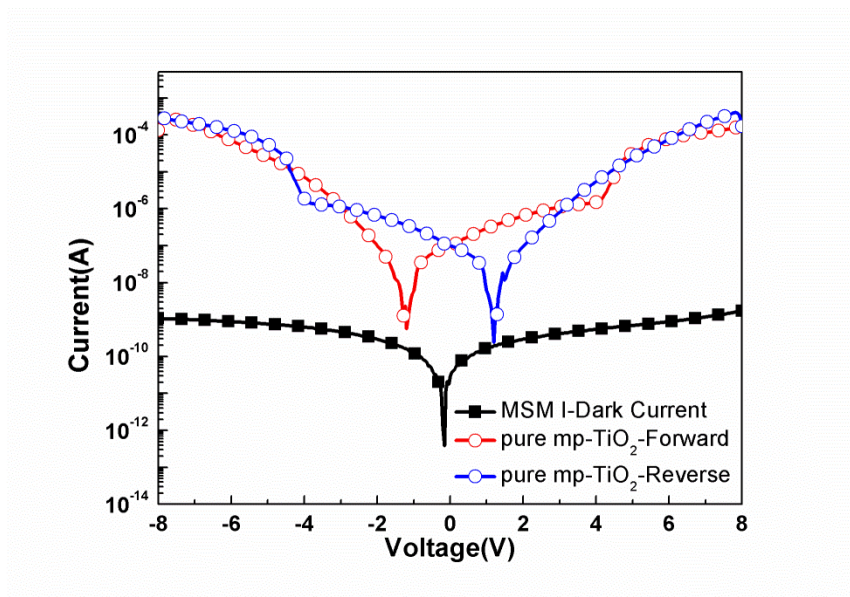

**Fig. S8** Dark current curves of the device MSM I and the pure mp-TiO<sub>2</sub> device.

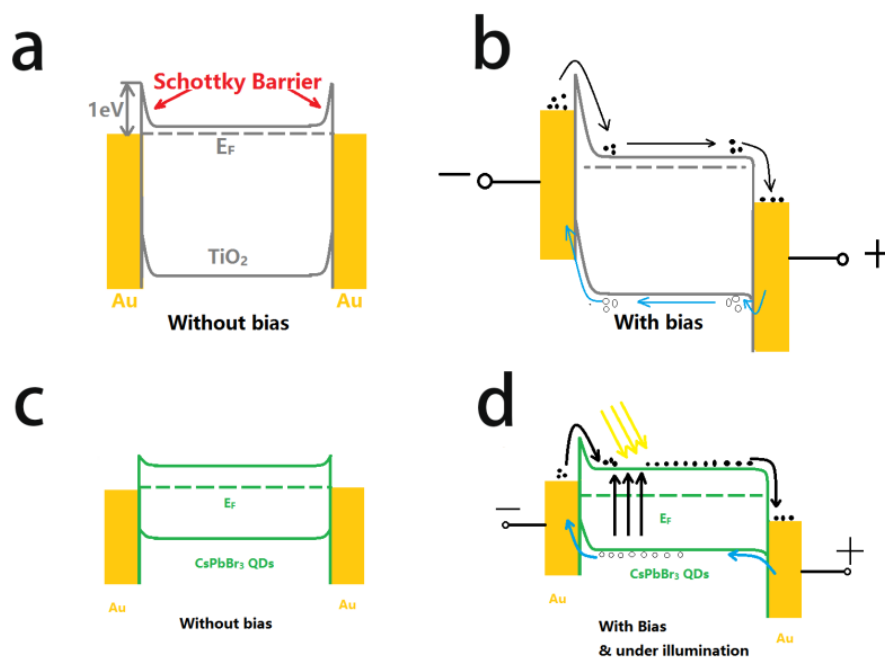

**Fig. S9** Schematic energy-band diagrams of MSM I. a) Au/CsPbBr<sub>3</sub> QDs/Au MSM device without external bias. b) The device MSM I with external bias under illumination.

1. L. Protesescu, S. Yakunin, M. I. Bodnarchuk, F. Krieg, R. Caputo, C. H. Hendon, R. X. Yang, A. Walsh and M. V. Kovalenko, *Nano letters*, 2015, **15**, 3692-3696.
